# Supplementary material
Source: PubMed Central journal article supplement (PMC3397685)
Supplement: NIHMS378644-supplement-1.pdf [file NIHMS378644-supplement-1.pdf]

## Lymph Node

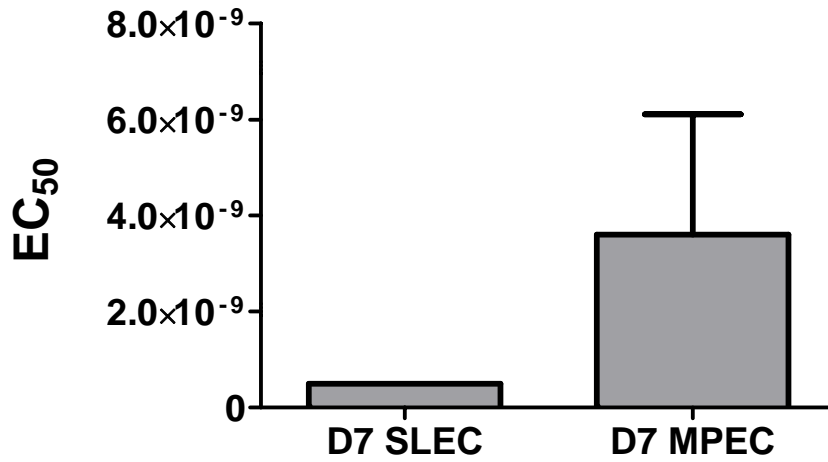

## Lung

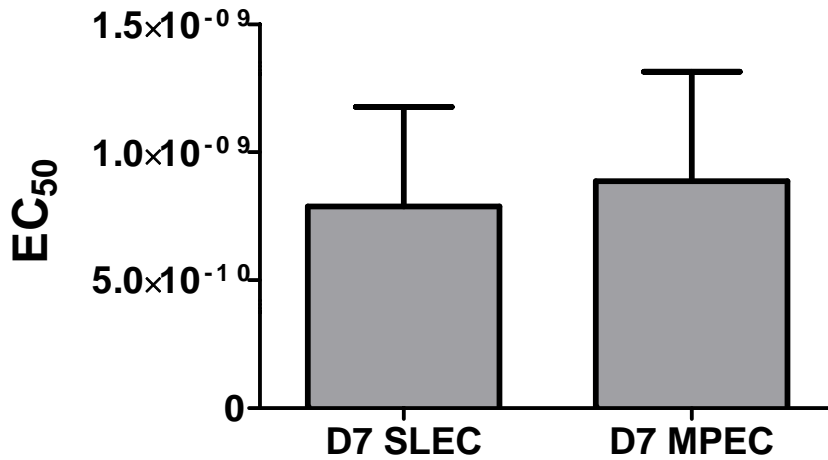

Supplemental Figure 1. SLEC in the MLN, but not the lung, are of higher avidity than MPEC on d7 p.i. Avidity was assessed by stimulation with titrated concentrations of B8R peptide. IFN $\gamma$  production was determined by ICCS.

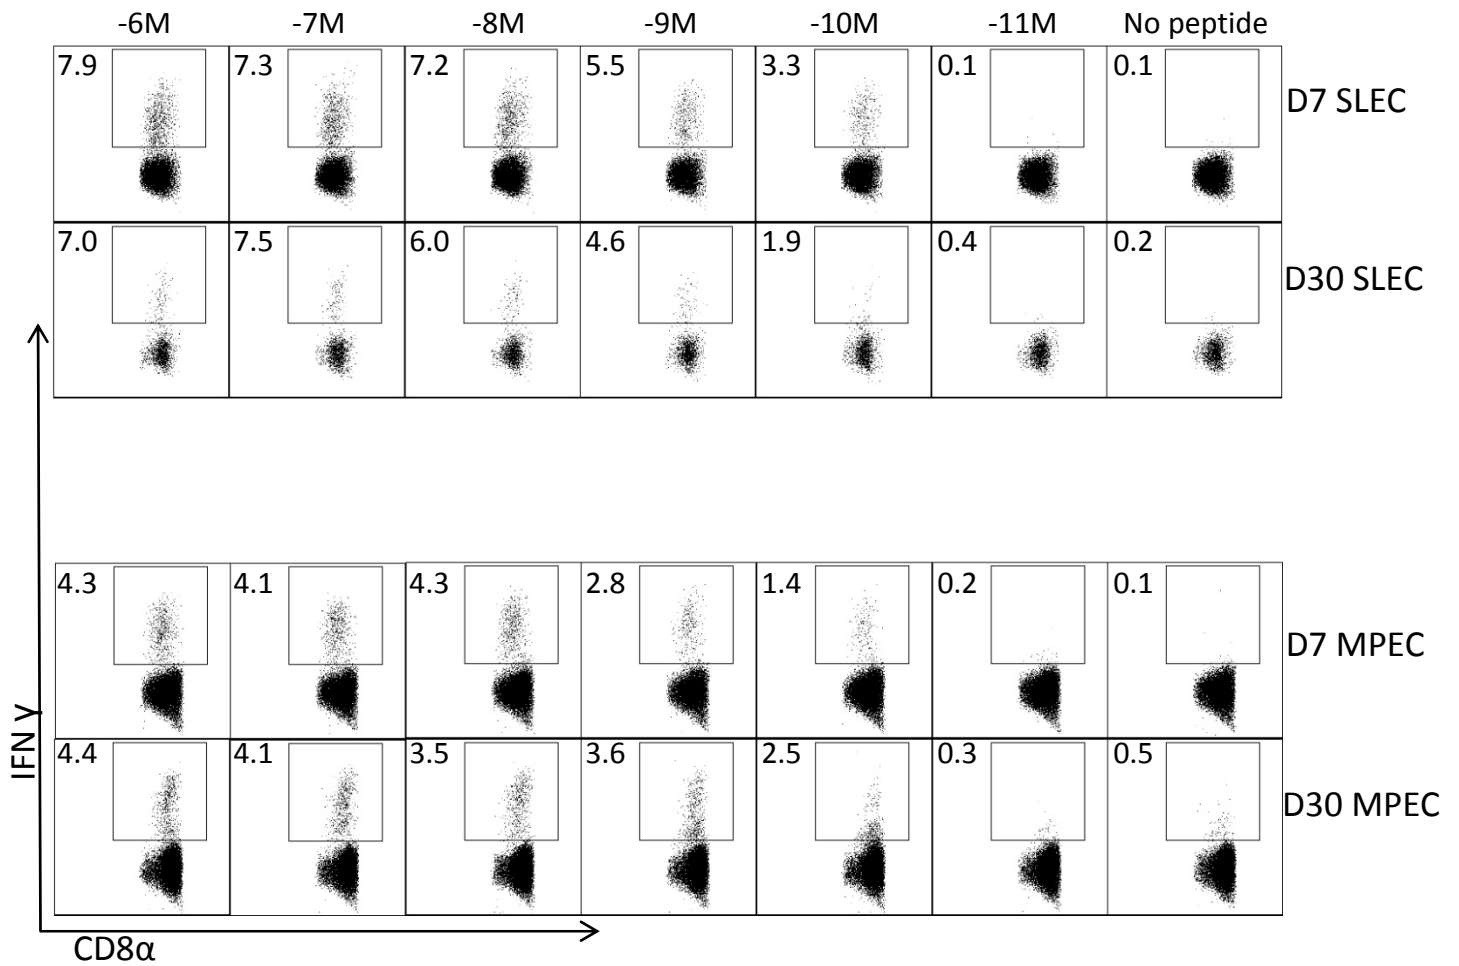

Supplemental Figure 2. Representative data for analysis of avidity in MPEC and SLEC populations on data d7 and d30 postinfection with VACV. Avidity was assessed by stimulation with titrated concentrations of B8R peptide. IFN $\gamma$  production was determined by ICCS. Cells were pre-gated on the CD8<sup>+</sup>CD44<sup>hi</sup> population.
